# Supplementary material for: A low-surface energy carbon allotrope: the case for bcc-C6
Source: Royal Society of Chemistry journal article supplement (doi:10.1039/c5cp00803d), 2015-01-01
Supplement: c5cp00803d1.pdf [file c5cp00803d1.pdf]

**Support information**

**Low-surface energy carbon allotrope: the case for bcc-C<sub>6</sub>**

Wen-Jin Yin<sup>1,2</sup>, Yuan-Ping Chen<sup>1</sup>, Yue-E Xie<sup>\*1</sup>, Li-Min Liu<sup>\*2</sup>, and S. B. Zhang<sup>3</sup>

<sup>1</sup>Department of Physics, Xiangtan University, Xiangtan 411105, Hunan, China

<sup>2</sup>Beijing Computational Science Research Center, Beijing 100084, China

<sup>3</sup>Rensselaer Polytechnic Institute, Troy, NY 12180, USA

<sup>\*1</sup>Corresponding author: [xieych@xtu.edu.cn](mailto:xieych@xtu.edu.cn)

<sup>\*2</sup>Corresponding author: [limin.liu@csrc.ac.cn](mailto:limin.liu@csrc.ac.cn)

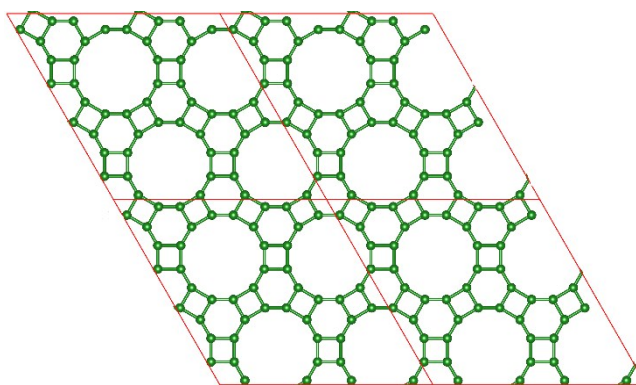

Figure S1. The relaxed two layered (2×2×1) supercell in (111) orientation. After optimization, the buckled initial structure becomes the plane sheet.
